# Supplementary material
Source: PubMed Central journal article supplement (PMC3118616)
Supplement: supp_00023.2011_tableS1.pdf [file supp_00023.2011_tableS1.pdf]

## Supplemental Data

Table 1. Primer List

| Luciferase Constructs                      |                                                 |
|--------------------------------------------|-------------------------------------------------|
| Construct                                  | Primer Sequence                                 |
| -2995/+88 Fwd                              | 5' -AATAG <u>GGTACCCTGGCTGTCC</u> TGAAACTC- 3'  |
| -976/+88 Fwd                               | 5' -AGCAG <u>GTACCAGGGATGGAGTTCAGGTC</u> - 3'   |
| -754/+88 Fwd                               | 5' -AGAGC <u>GGTACCACGAGTAGGTAGTGCC</u> TTG- 3' |
| -476/+88 Fwd                               | 5' -ACCAG <u>GTACCGCAACAAACCACGATGT</u> - 3'    |
| -224/+88 Fwd                               | 5' -TATAG <u>GTACCCACCTTGGCCGAGGATG</u> C- 3'   |
| -194/+88 Fwd                               | 5' -AAAAG <u>GTACCAGGGGGCGCACGGAG</u> - 3'      |
| -182/+88 Fwd                               | 5' -AAAAG <u>GTACCGGAGCTTTGGGCG</u> - 3'        |
| -160/+88 Fwd                               | 5' -AACG <u>GGTACCTTTCACGTGACGTGG</u> - 3'      |
| -144/+88 Fwd                               | 5' -AAAG <u>GTACCATTTCCTAGTCGGCCCAG</u> - 3'    |
| -113/+88 Fwd                               | 5' -AGTAG <u>GTACCCTGGCATCACCCGGAG</u> - 3'     |
| -88/+88 Fwd                                | 5' -ATTAG <u>GTACCTCAGAGGCGGGCGGGGCGAA</u> - 3' |
| -57/+88 Fwd                                | 5' -ATTAG <u>GTACCTGGGGAGGTTGGGGCT</u> - 3'     |
| -15/+88 Fwd                                | 5' -AAAAG <u>GTACCTCCGCCTGCGCCTAGACTC</u> - 3'  |
| Rev                                        | 5' -ATTAG <u>ATATCCAGGGCTGGGGTTCGAGC</u> - 3'   |
| Luciferase Construct with Mutation on HREs |                                                 |
| ΔHRE 1 Fwd                                 | 5' -CACCAGGGGGCGCACG-3'                         |
| ΔHRE 1 Rev                                 | 5' -CATGCATCCTCGGCCAAGG-3'                      |
| ΔHRE 2 Fwd                                 | 5' -ACGTGGACCATTTCCTAGTCGG-3'                   |

|                         |                                  |
|-------------------------|----------------------------------|
| ΔHRE 2 Rev              | 5'-TGAAAGGGAGCGCGCG-3'           |
| ΔHRE 3 Fwd              | 5'-GACCATTTCCCTAGTCGGCCC-3'      |
| ΔHRE 3 Rev              | 5'-TCACGTGAAAGGGAGCGCG-3'        |
| qRT-PCR                 |                                  |
| 18S Fwd                 | 5'-TCCAAGGAAGGCAGCAGGC-3'        |
| 18S Rev                 | 5'-TACCTGGTTGATCCTGCCA-3'        |
| Atp7a Comm Fwd          | 5'-TGAACAGTCATCACCTTCATCGTC-3'   |
| Atp7a Comm Rev          | 5'-TGCATCTTGTTGGACTCCTGAAAG-3'   |
| ChIP Assay              |                                  |
| Atp7a Fwd               | 5'-TGCTAGGGCCTAACCCACCTTG-3'     |
| Atp7a Rev               | 5'-AAGCTGGGCCGACTAGGGAAAT-3'     |
| Ankrd37 Fwd             | 5'-CTTGCAGACAGAAGCCCCAGTACA-3'   |
| Ankrd37 Rev             | 5'-GGTTGATATCCTGGCCTTTGAGCT-3'   |
| Dmt1 Fwd                | 5'-CTCTGCTTTGAAGTCTCCTAGTCC-3'   |
| Dmt1 Rev                | 5'-TGAGATTTTCATTTATGTGCCATTC-3'  |
| Negative Control<br>Fwd | 5'-AGCCTGGCTTTGATGGATGATTTT-3'   |
| Negative Control Rev    | 5'-TTTAGTCACCTCCCAACTCCAGGAAT-3' |
